# Supplementary material
Source: PubMed Central journal article supplement (PMC7750305)
Supplement: NIHMS1628634-supplement-3.pdf [file NIHMS1628634-supplement-3.pdf]

**Supplemental Table 1.** Characteristics of the female human hepatocyte donors.

| <b>Vendor</b> | <b>Lot</b>          | <b>Age (years)</b> | <b>Gender</b> | <b>Race</b> | <b>Serology</b> | <b>Drug History</b> | <b>Cause of death</b>        |
|---------------|---------------------|--------------------|---------------|-------------|-----------------|---------------------|------------------------------|
| Gibco         | HU1880              | 34                 | F             | Cauc        | -               | Lyrica, Vitamin B   | Not reported                 |
| Xenotech      | HC3-26 <sup>a</sup> | 43                 | F             | Cauc        | -               | Not reported        | Cerebrovascular accident     |
| Gibco         | HU8284              | 46                 | F             | Cauc        | -               | None                | Self inflicted gunshot wound |
| Xenotech      | HC5-40 <sup>b</sup> | 49                 | F             | Cauc        | CMV+            | Not reported        | Anoxia                       |

<sup>a</sup> Hepatocytes from this lot were Transporter Certified™ (BioIVT, Durham, NC)

<sup>b</sup> Hepatocytes from this lot exhibited suboptimal cell viability in culture during the mRNA induction experiment, and thus were not used for the subsequent quantitative proteomics and nifedipine metabolism experiments.

## Supplemental Figure 1.

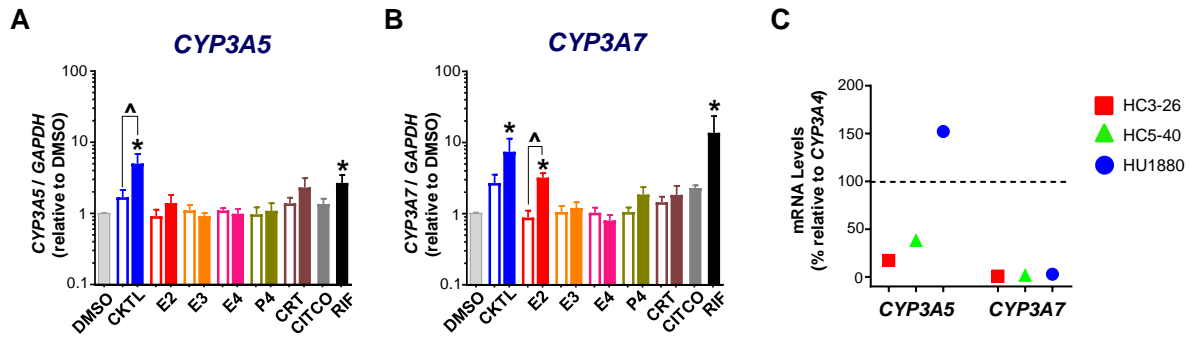

**Supplemental Figure 1. Effect of pregnancy-related hormones on *CYP3A5* and *CYP3A7* mRNA levels in SCHH.** Human hepatocytes from three female donors (HU1880, HC3-26 and HC5-40) were exposed to hormones (E2, E3, E4, P4, CRT), either individually or in combination as a cocktail (CKTL) of all hormones, or controls (DMSO, CITCO, Rifampin [RIF]) for 72 h (n=2/group within each donor). (A) *CYP3A5* and (B) *CYP3A7* mRNA levels were quantified, normalized to *GAPDH*, expressed relative to vehicle (DMSO) control within each donor, and then combined for comparison across experimental groups (n=3 donors/group; \*p<0.05 vs. DMSO). Concentration-dependent effects were evaluated (open bar: 1  $\mu$ M, solid bar: 10  $\mu$ M; ^p<0.05 1 vs. 10  $\mu$ M). (C) Average basal *CYP3A5* and *CYP3A7* mRNA levels, relative to *CYP3A4*, in SCHH from donors HU1880, HC3-26 and HC5-40 (mean: n=2/donor).

**Supplemental Figure 2.**

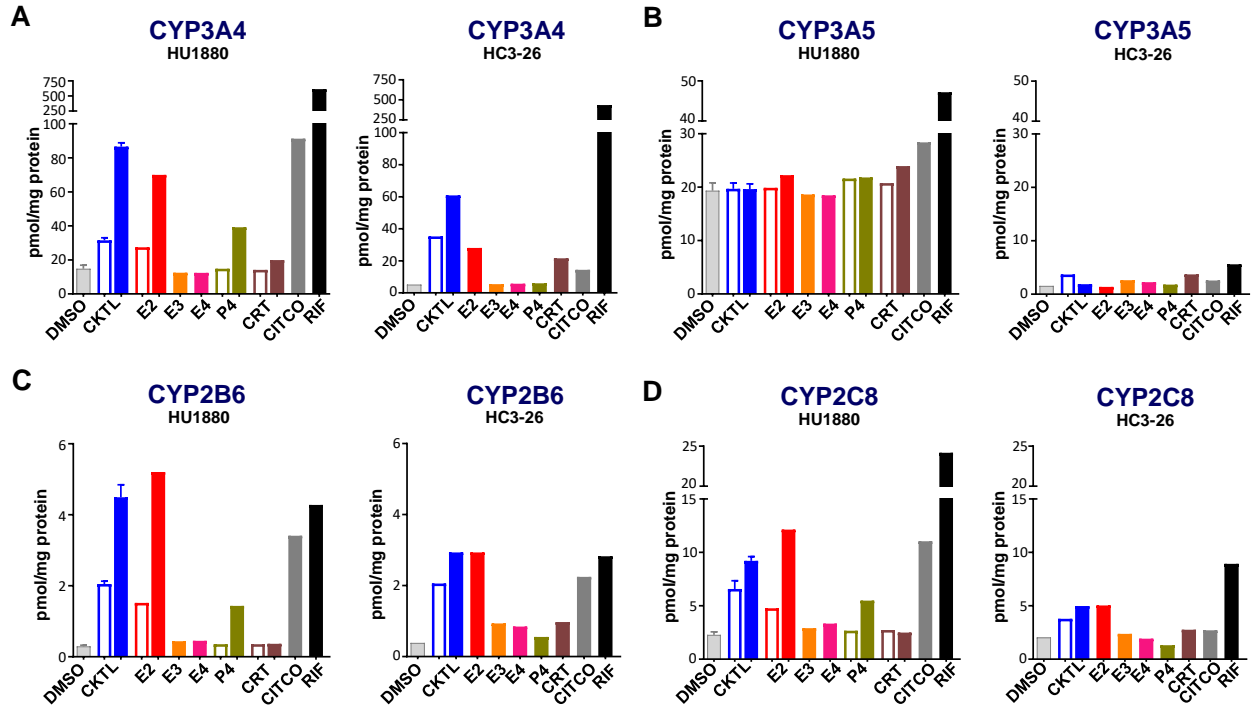

**Supplemental Figure 2. Effect of pregnancy-related hormones on absolute protein concentrations of CYP3A4, CYP3A5, CYP2B6, and CYP2C8 in SCHH by donor.** Following 72 h of hormone exposure, (A) CYP3A4, (B) CYP3A5, (C) CYP2B6, and (D) CYP2C8 protein concentrations were quantified by QTAP in SCHH membrane-associated protein isolated from two donors (HU1880, HC3-26). Absolute protein concentrations in the individual hormone (E2, E3, E4, P4, CRT) and control (CITCO, RIF) treatment groups in donor HU1880 and donor HC3-26 (mean: n=2/group). Concentration-dependent effects (open bar: 1 μM, solid bar: 10 μM) were evaluated for E2, P4 and CRT in donor HU1880 only. Protein concentrations in the DMSO and hormone cocktail (CKTL) groups in donor HU1880 (mean ± SEM: n=3-4/group) and donor HC3-26 (mean: n=2/group), which are also presented in Figure 2 (CYP3A4, CYP3A5) and Figure 5 (CYP2B6, CYP2C8), are included for comparison.

### Supplemental Figure 3.

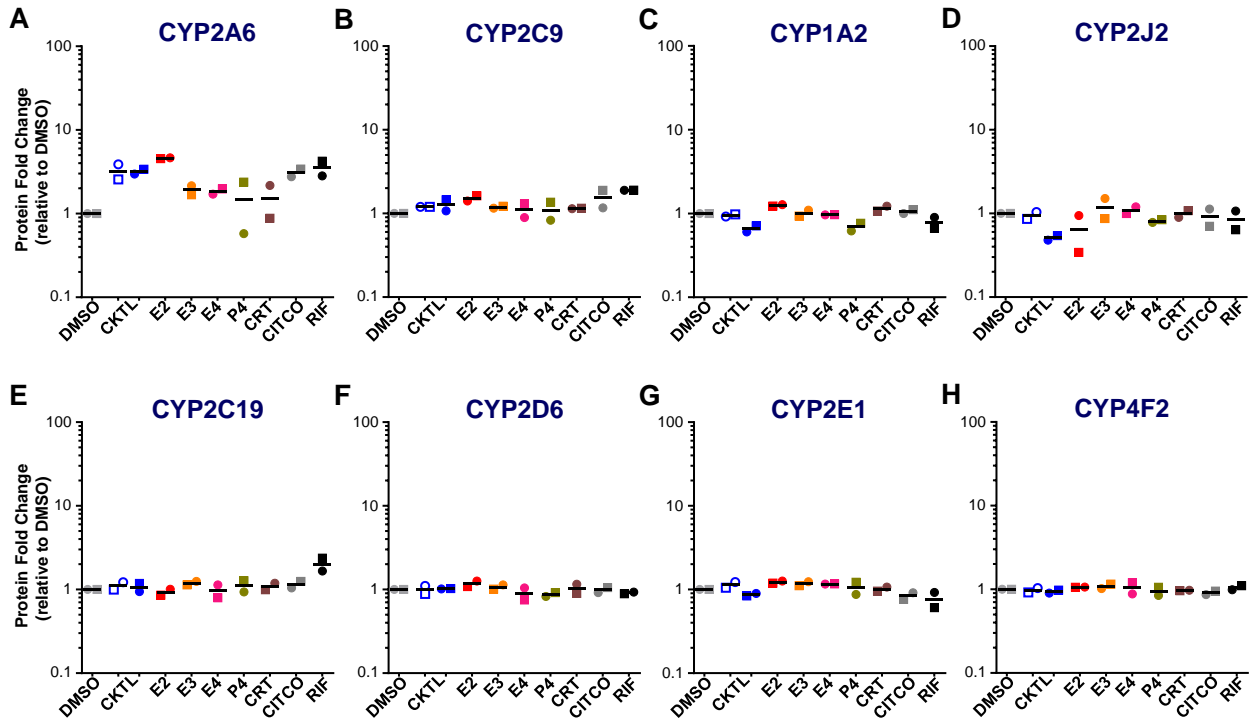

**Supplemental Figure 3. Effect of pregnancy-related hormones on protein concentration of other key CYP isoforms in SCHH.** Following 72 h of hormone exposure, protein concentrations of eight additional CYP isoforms (A: CYP2A6, B: CYP2C9, C: CYP1A2, D: CYP2J2, E: CYP2C19, F: CYP2D6, G: CYP2E1, H: CYP4F2) were quantified by QTAP in SCHH membrane-associated proteins isolated from two donors (HU1880, HC3-26). Protein levels of each CYP isoform were expressed relative to vehicle (DMSO) within each donor, and then combined for comparison across experimental groups. The effect within donor HC3-26 (circles) and donor HU1880 (squares) is represented by the individual data points. Open circles and squares represent 1 μM CKTL. Solid circles and squares represent 10 μM CKTL and 10 μM for the individual hormones.
